# Supplementary material for: Investigating the copper coordination, electrochemistry, and Cu(ii) reduction kinetics of biologically relevant selone and thione compounds
Source: Royal Society of Chemistry journal article supplement (doi:10.1039/c2dt11731b), 2012-01-01
Supplement: c2dt11731b.pdf [file c2dt11731b.pdf]

## Investigating the Coordination, Electrochemistry, and Kinetics of $\text{Cu}^{2+}$ Reduction by Biologically Relevant Selone and Thione Compounds

Martin M. Kimani, Hsiao C. Wang, and Julia L. Brumaghim\*

Department of Chemistry, Clemson University, Clemson, SC 29634-0973, USA

### SUPPLEMENTARY INFORMATION

**X-ray structural data.** Crystal packing diagrams of **1** and **2** along the *a*-axis and **4b** along the *b*-axis showing short contact interactions between S-O, Se-O, O-H, H-F and Se-Se (Figs. S1-S3).

**Electrochemical studies.** Cyclic voltammograms of MISeox and  $\text{Cu}^{2+/+}$  reduction couples of  $[\text{Cu}(\text{dmit})_3][\text{OTf}]$  (**3**) and  $[\text{Cu}(\text{dmise})_4][\text{OTf}]$  (**4**) (Fig. S4).

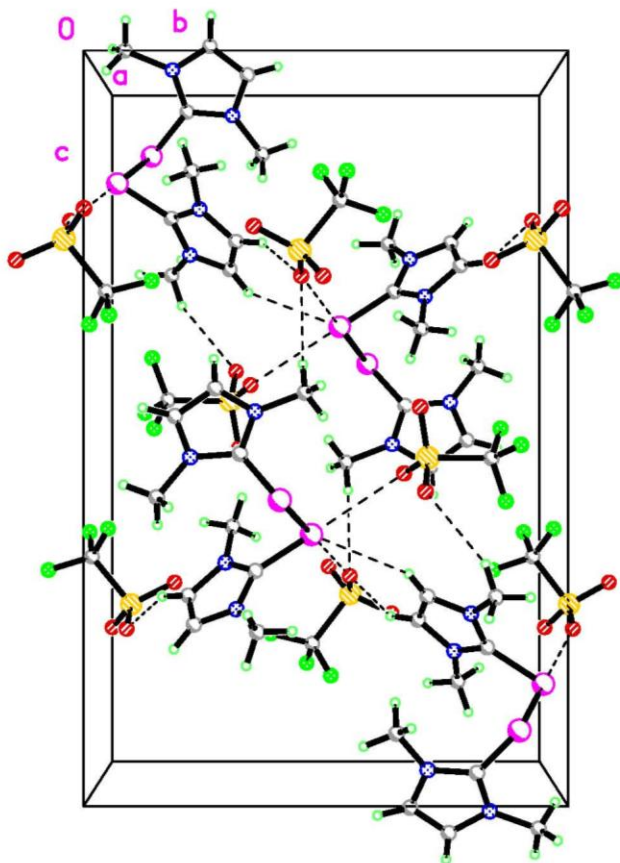

**Fig. S1.** Crystal packing diagram of  $[(\text{dmise})_2][(\text{OTf})_2]$  (**1**) along the *a*-axis showing short contact interactions and hydrogen bonds between Se-O, H-O, and F-H atoms.

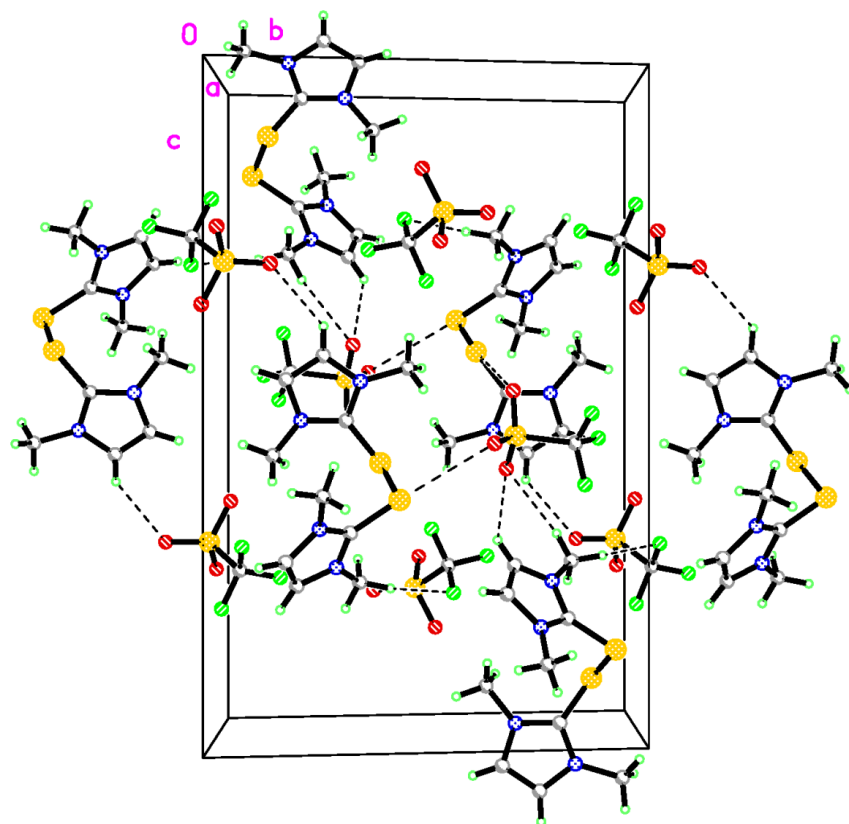

**Fig. S2.** Crystal packing diagram of  $[(dmit)_2][(OTf)_2]$  (**2**) along the  $a$ -axis showing short contact interactions and hydrogen bonds between S-O, H-O, and F-H atoms.

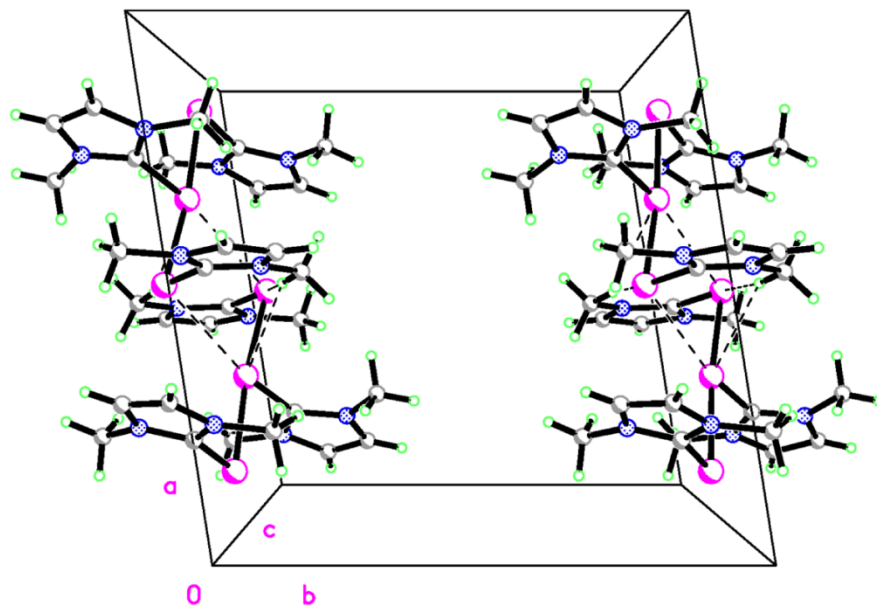

**Fig. S3.** Crystal packing diagram of  $[(dmise)_3][(OTf)_2]$  (**4b**) along the  $b$ -axis showing short contact interactions between Se-Se atoms.

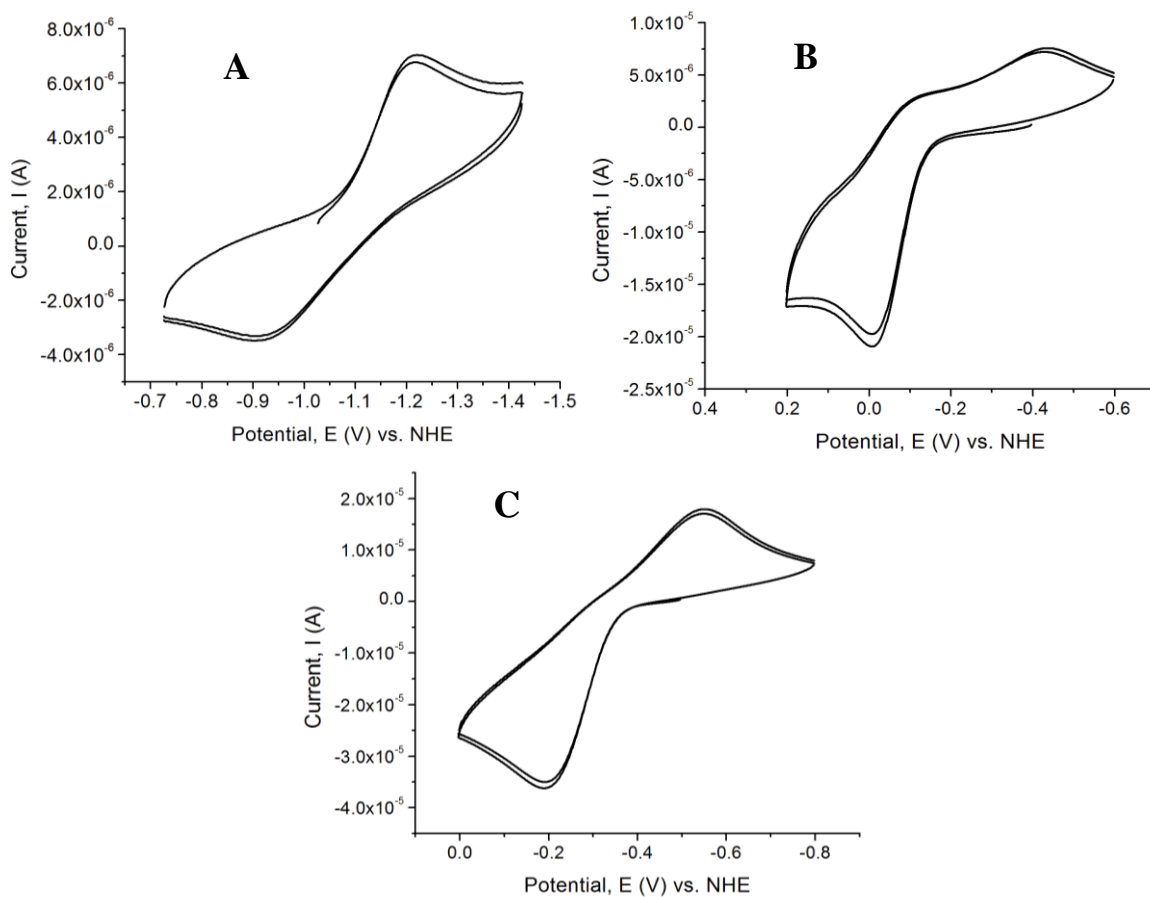

**Fig. S4.** Cyclic voltammetry scans for A) MISEox, B) [Cu(dmit)<sub>3</sub>][OTf] (**3**), and C) [Cu(dmise)<sub>4</sub>][OTf] (**4a**). All data were collected with 1 mM complex in acetonitrile. Potentials are reported versus normal hydrogen electrode (NHE).

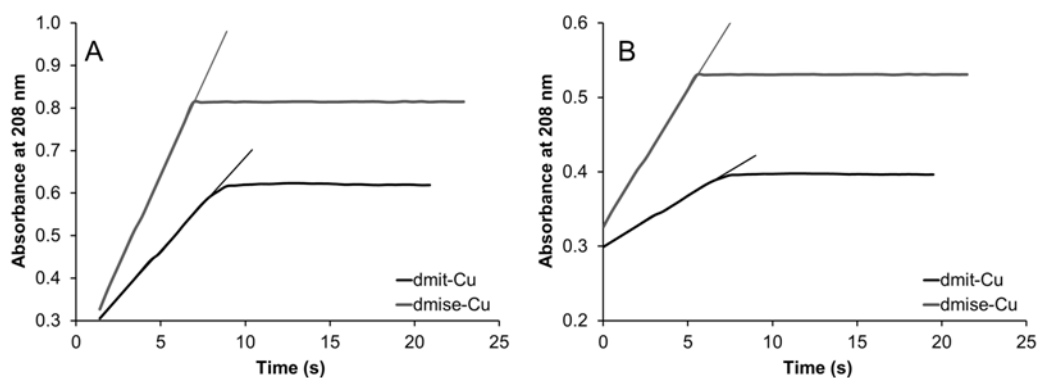

**Fig. S5.** Kinetics plots of Cu(OTf)<sub>2</sub> reduction by dmit and dmise in acetonitrile with different molar ratios of Cu<sup>2+</sup> to ligand showing the initial rate fitting: A) 1 to 0.5 and B) 1 to 0.1. For these experiments, Cu(OTf)<sub>2</sub> concentration was 25  $\mu$ M and dmise or dmit concentrations were 2.5 and 12.5  $\mu$ M, respectively.

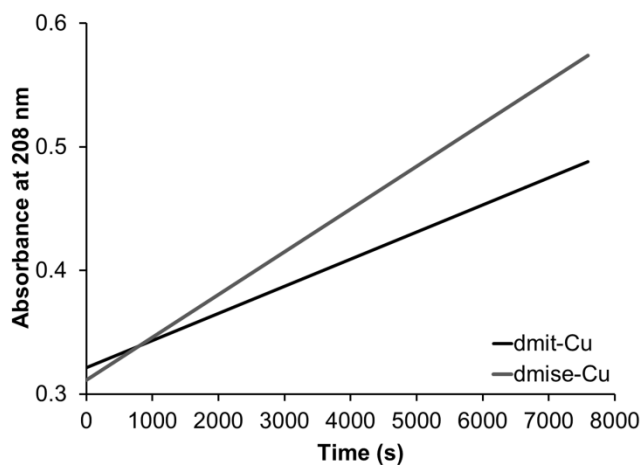

**Fig. S6.** Kinetics plots of  $\text{Cu}(\text{OTf})_2$  ( $25 \mu\text{M}$ ) reduction by dmit and dmise ( $25 \mu\text{M}$ ) in acetonitrile under anaerobic conditions.

**Table S1.** Initial rates of  $\text{Cu}(\text{OTf})_2$  reduction by dmise and dmit in acetonitrile with different molar ratios of ligand to  $\text{Cu}^{2+}$ .

| Ligand to $\text{Cu}^{2+}$ ratio | Rate with dmit ( $\text{s}^{-1}$ ) | Rate with dmise ( $\text{s}^{-1}$ ) |
|----------------------------------|------------------------------------|-------------------------------------|
| 1 : 1                            | $0.18 \pm 0.01$                    | $0.50 \pm 0.03$                     |
| 0.5 : 1                          | $0.044 \pm 0.001$                  | $0.087 \pm 0.001$                   |
| 0.1 : 1                          | $0.0135 \pm 0.0006$                | $0.0363 \pm 0.0005$                 |
| 1 : 1 (anaerobic)                | $2.000 \pm 0.001 \times 10^{-5}$   | $3.015 \pm 0.001 \times 10^{-5}$    |
